# Supplementary material
Source: publisher site journal article supplement (https://www.dovepress.com/article/287379)
Supplement: Supplementary file 1 [file get_supplementary_file.php]

**Supplementary Material**

**APPENDIX 1 INFORMED CONSENT FORM.**

MAKERERE UNIVERSITY COLLEGE OF HEALTHSCIENCES

INFORMED CONSENT FOR PARTICIPATION IN THE STUDY

**Assessing Knowledge, Attitudes and Practices Towards Covid-19 Public Health Preventive Measures Among Patients at Mulago National Referral Hospital.**

Protocol Date:

Principal Investigator: Twinamasiko Nelson 0779865716

Co-Investigators: Wasswa Enoch, Sserunjogi Emmanuel

Nakityo Innocent, Gwokyalya Anna-Maria

Olum Ronald.

Site Location: Mulago Hospital

Dear Participant, my name is …………………………….. And I am part of the team conducting a study titled as above.

We are asking you to volunteer for the above mentioned study. We shall first explain why we are doing this study, the good and the bad about it, and what will be asked of you if you agree to participate in the study.

If you choose to participate in the research study, we will ask you to sign this consent and then continue on asking you the questions we have for the study. A copy of this consent form will be given to you.

PURPOSE OF THE STUDY

It is a public health fact that in Uganda, the war against COVID-19 will be won or lost in the community. Presently, communities have the panacea on how the response progresses simply because COVID-19 infections are increasingly being detected in communities across the country. Poor understanding of the disease among the community, especially the high-risk groups is implicated for the increase in the spread of the infection and death toll. Therefore, successful control and minimization of morbidity and mortality due to COVID-19 require changing the behavior, which is influenced by people’s knowledge and perceptions, of the general public, especially the high-risk groups. It is, therefore important that a survey like this be carried out so that evidence-based strategies are put in place to address possible shortcomings

NUMBER OF PARTICIPANTS

A total number of 100 participants (patients and their caretakers) are anticipated to participate in the study.

VOLUNTARY PARTICIPATION

Before you learn about the study procedures, it’s important to know these things;

- Participation in this study is entirely voluntary
- You do not have to participate in the study if you do not want to and the decision doesn’t affect your health or life in any way.
- You may stop being in the study at any time.
- If you decide to not take part in the study, you can still join another research study later, if one is available and you qualify.

STUDY PROCEDURES

If you choose to participate in the study, you will be required to answer questions we shall be asking you, which will include questions that address your knowledge, attitudes and practices on COVID19 and the respective public health measures. The questions will also contain some socio-demographic characteristics.

POSSIBLE RISKS OF STUDY PARTICIPATION

We anticipate this research study to have no risk.

BENEFITS

You may not receive any direct benefit from participating in the study. The information obtained may be used in formulation of future public health guidelines against any future pandemic. The information obtained may as well be used to improve public health adherence practices. You may also get some personal satisfaction from being part of research aimed at improving healthcare.

COSTS TO YOU

No monetary costs apart from your time.

REIMBURSEMENT

A bar of soap will be given to you to compensate for your time.

CONFIDENTIALITY

Efforts will be made to keep your personal information confidential. Any study information about you will be identified only by code. Any publication of this study will not use your name or identify you personally.

QUESTIONS

This study has been approved by Mulago Hospital Research & Ethics Committee (MHREC) and will be conducted according to the Uganda Guidelines for Research involving Human Participants. In the event of any problems/concerns/questions about the study, please contact Twinamasiko Nelson on 0779865716/drtwinamasikonelson@gmail.com.

In case, you have questions as regards to your rights for participating in this research, Please contact the Chairperson, Mulago Hospital Research & Ethics Committee (MHREC), Dr. Fred Nakwagala (0772-325869, nakwagala@yahoo.com).

DECLARATION BY PARTICIPANT

By signing below, I ………………………………………………… …agree to take part in a research study entitled “ASSESSING KNOWLEDGE, ATTITUDES AND PRACTICES TOWARDS COVID-19 PUBLIC HEALTHPREVENTIVE MEASURES AMONG PATIENTS AT MULAGO NATIONAL REFERRAL HOSPITAL.**”**

I declare that:

- I have read or had read to me this information and consent form and it is written in a language with which I am fluent and comfortable.
- I have had a chance to ask questions and all my questions have been adequately answered.
- I understand that taking part in this study is voluntary and I have not been pressurized in any way.
- I may choose to leave the study at any time and will not be penalized or prejudiced in any way.
- I may be asked to leave the study before it has finished, if the study PI or researcher feels it is in my best interests, or if I do not follow the study plan, as agreed to.

………………………. ……………………………….. ……………………….

Name of Participant Signature of Participant Date

………………..………… …… ………………………… ………………………..

Name of study staff Staff signature Date

**APPENDIX II QUESTIONNAIRE**

**Assessing Knowledge, Attitudes and Practices Towards Covid-19 Public Health Preventive Measures Among Patients at Mulago National Referral Hospital.**

SOCIO-DEMOGRAPHIC QUESTIONS (Tick one that applies).

1. **Age**

18-24

25-34

25-44

Above 44

1. **Gender**

Male

Female

1. **Marital status**

Single (never married)

Married

Divorced

Widowed

1. **Employment Status**

Student

Employed

Not employed

Self-employed

1. **Education Level**

Primary

Secondary (O-level)

Secondary (A-level)

Diploma

Bachelors Degree

Master’s Degree

Doctoral and Over

1. **Place of Residence**

……………………………………

QUESTIONS ON KNOWLEDGE AND AWARENESS (Tick one that applies).

1. **Are you are aware that COVID-19 Exists?**

Yes

No

I’m not sure

1. **Does COVID-19 have a cure?**

Yes

No

I’m not sure

1. **Who do you think is at risk of getting COVID-19?**

Everyone

Children

Adults (18+Years)

I don’t know

1. **Who do you think is at highest risk for Severe Illness of COVID-19?**

Everyone

Children

Adult s (18-40 years)

Adults (40+ years)

People with other diseases

I don’t know

1. **COVID-19 is transmitted through**

Cough droplets after sneezing

Talking with other people

Hand shake

Touching eyes and mouth

Making contact with animals

I don’t know

1. **People with COVID-19 have**

Fever

Itching throat

Cough

Flu

Diarrhoea

Difficulty in breathing

Pain in the stomach

Vomiting

Weakness

Most people don’t have symptoms

I don’t know

1. **How long does it take a person with COVID-19 to get symptoms?**

One day

2-5 days

5-14 day

14+ days

I don’t know

1. **Does COVID-19 have a vaccine?**

Yes

No

1. **How can one prevent COVID-19?**

Washing hands with water and soap

Using Sanitizer

Using Facemask

Coughing in the elbow

Avoiding handshakes

Social Distancing

1. **What is the recommended social distance?**

1 meter

2 meters

3 meters

4 meters

QUESTIONS ON ATTITUDES (Tick one that applies)

1. **If you are tested for COVID-19 and results are positive, would you believe?**

Yes

No

I’m not sure

1. **If your friend or family member is tested positive for COVID-19, would you believe?**

Yes

No

I’m not sure

1. **Do you think lock down helped in spreading COVID-19?**

Yes

No

1. **Do you think government was right to put up the measures it did to prevent spread of COVID-19?**

Yes

No

1. **How do you rate government’s efforts towards COVID-19 prevention and treatment?**

Not Good

Fair

Good

Excellent

QUESTIONS ON PRACTICES (Tick one that applies).

1. **22. I stay home when I feel flu-like symptoms**

Yes

No

1. **When I cough or sneeze, I cover my mouth and nose with the;**

Hands

Crease of Elbow

Tissue paper or Handkerchief.

1. **How often do you wash your hands with soap**

Always

Sometimes

Never

1. **Approximately how many times did you wash your hands or use a hand sanitizer yesterday**

………………………………………

1. **When was the last time you were in a public gathering/place with more than 2 people?**

Today

Last 2 days

Last 3 to 6 days

More than a week ago

1. **When in public I wore a mask**

Always

Sometimes

Never

1. **When in Public, I maintained a distance of atleast 2 meters between us**

Yes, Always

Yes, Sometimes

No, Never

1. **29. How difficult is it for you personally to follow the protective measure of staying home/Hand hygiene as much as possible? 1 = not difficult at all <=> 5 = extremely difficult**

1

2

3

4

5
